# Supplementary material
Source: PubMed Central journal article supplement (PMC2265175)

**A** % of  $\beta$ -gal+ cells amongst all astrocytes in the intact cortex and at the lesion site

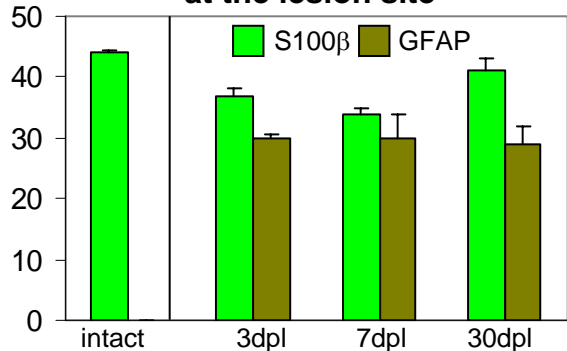

**B** % of BrdU+/ $\beta$ -gal-negative astrocytes

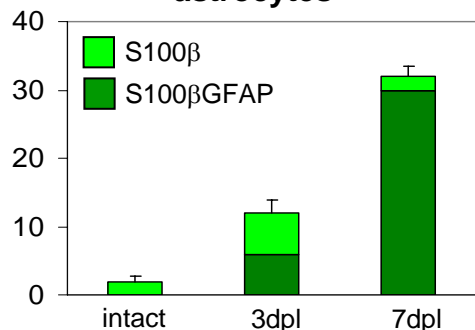

**C** % increase of  $\beta$ -gal+ cells upon injury

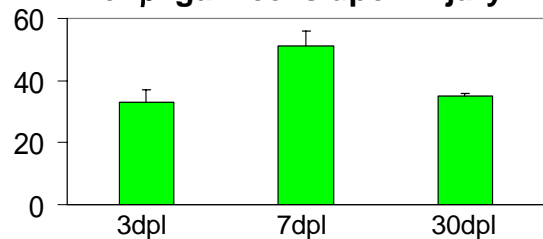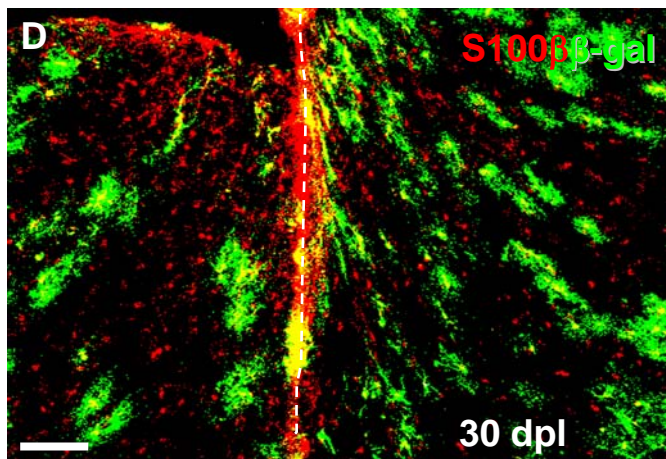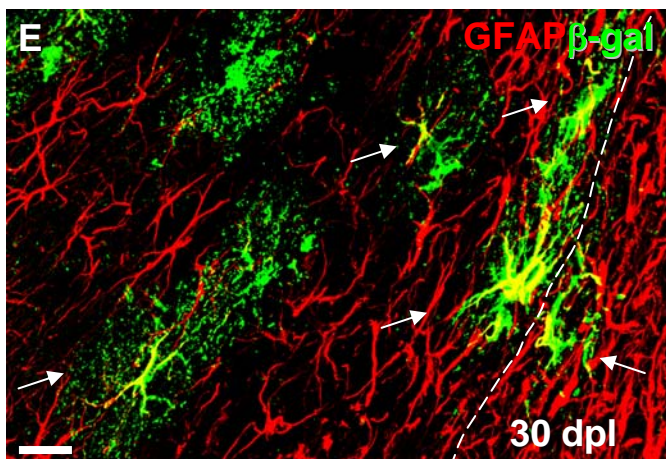

Supplement: pnas_0709002105_2.pdf [file pnas_0709002105_2.pdf]
