# Supplementary material
Source: PubMed Central journal article supplement (PMC2265175)

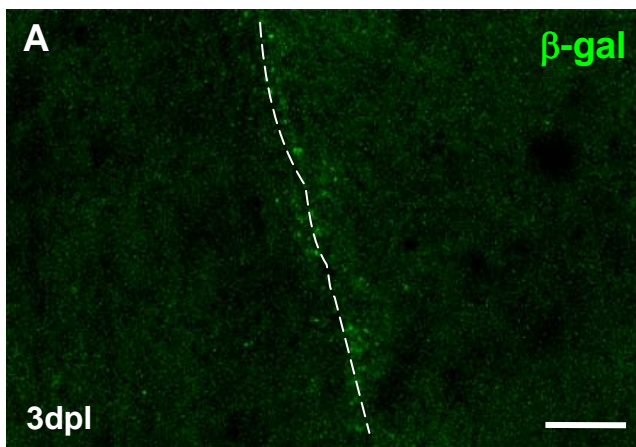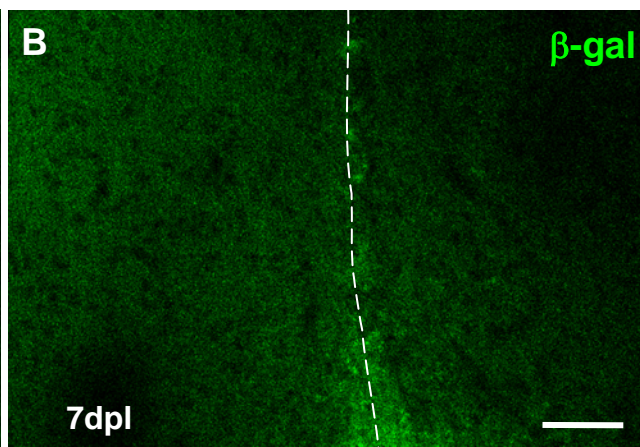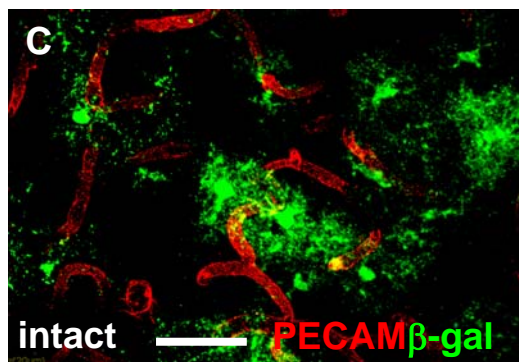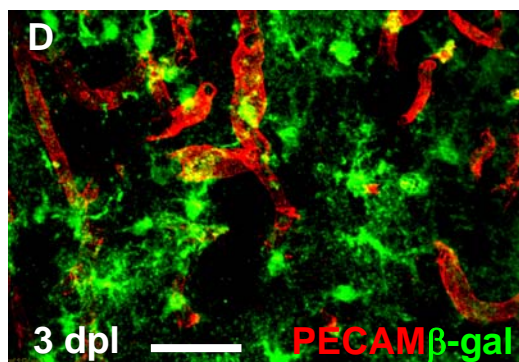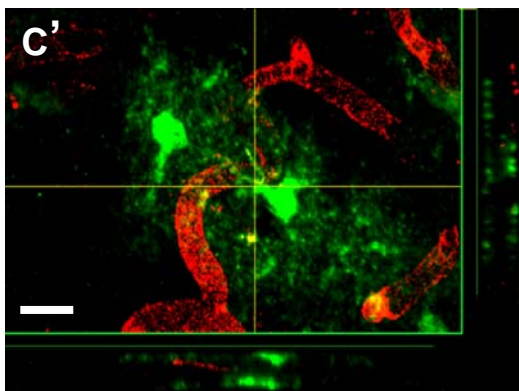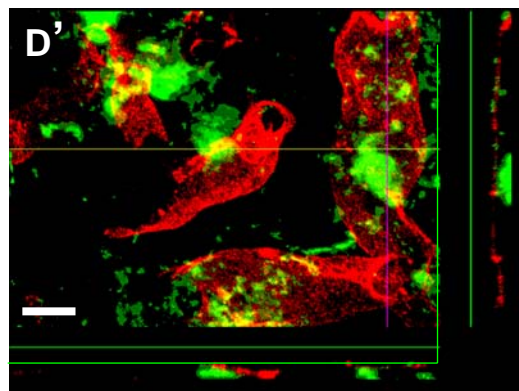

Supplement: pnas_0709002105_1.pdf [file pnas_0709002105_1.pdf]

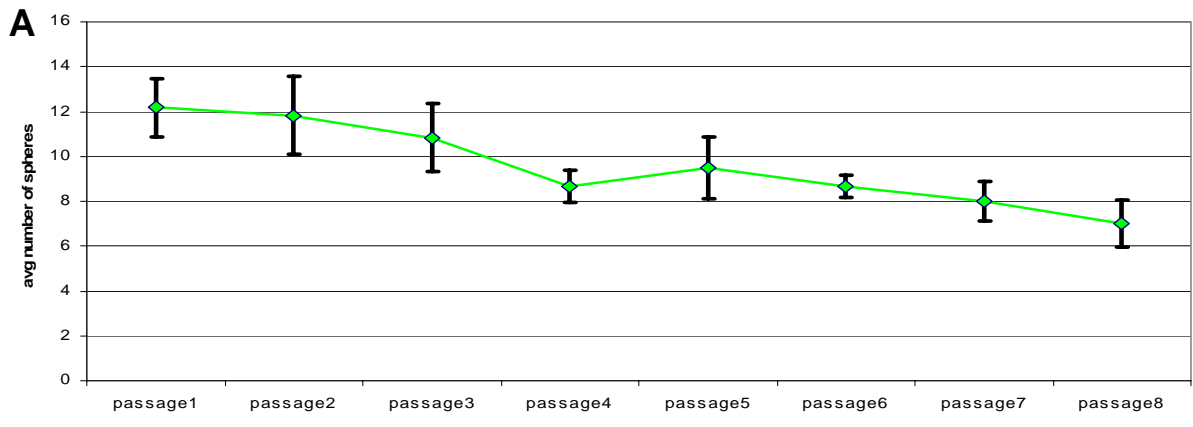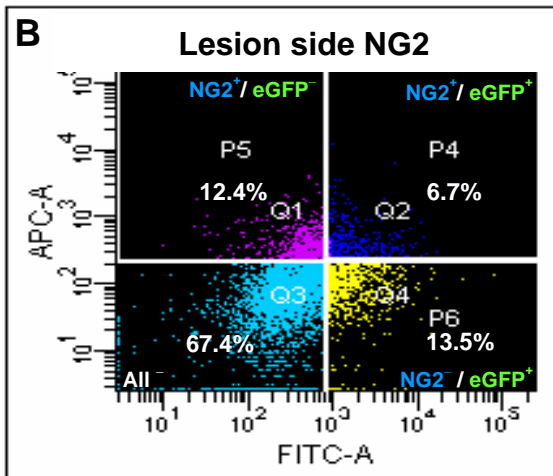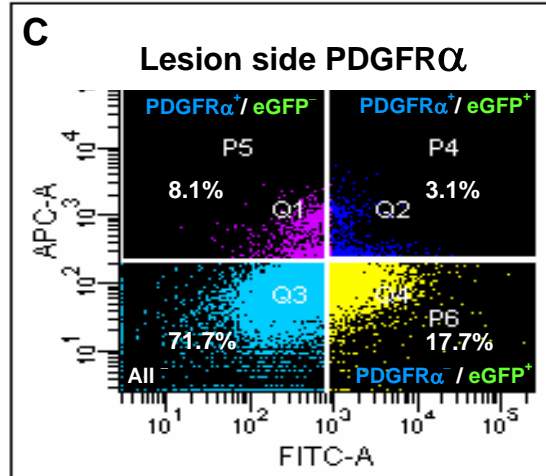

Supplement: pnas_0709002105_3.pdf [file pnas_0709002105_3.pdf]

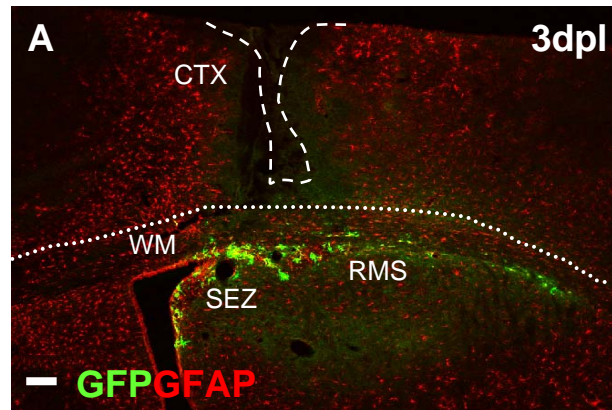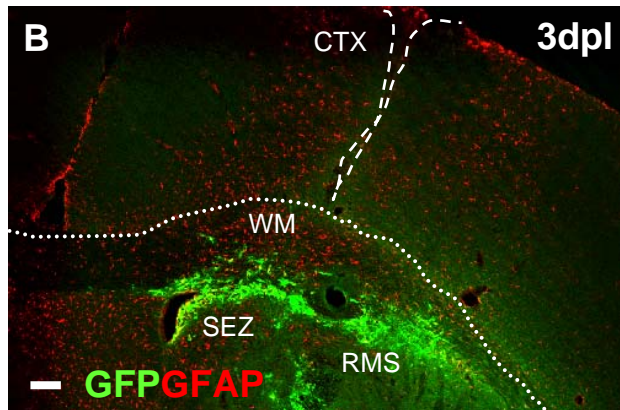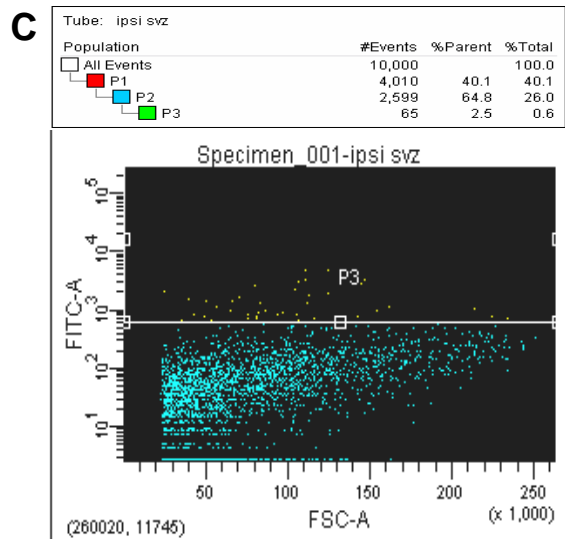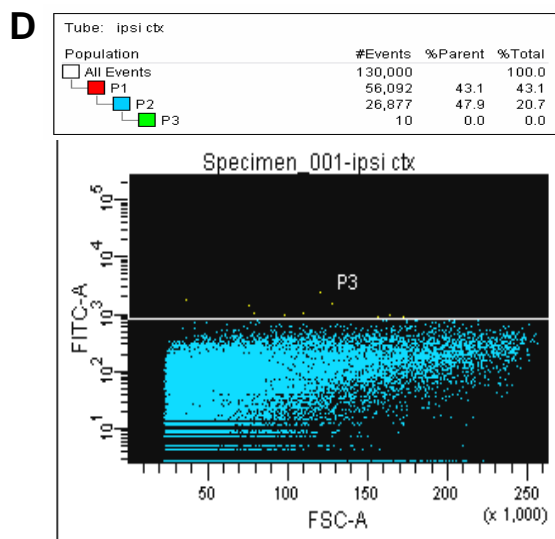

Supplement: pnas_0709002105_4.pdf [file pnas_0709002105_4.pdf]
